# Supplementary material
Source: publisher site journal article supplement (https://www.dovepress.com/get_supplementary_file.php?f=377066.docx)
Supplement: Supplementary file 1 [file get_supplementary_file.php]

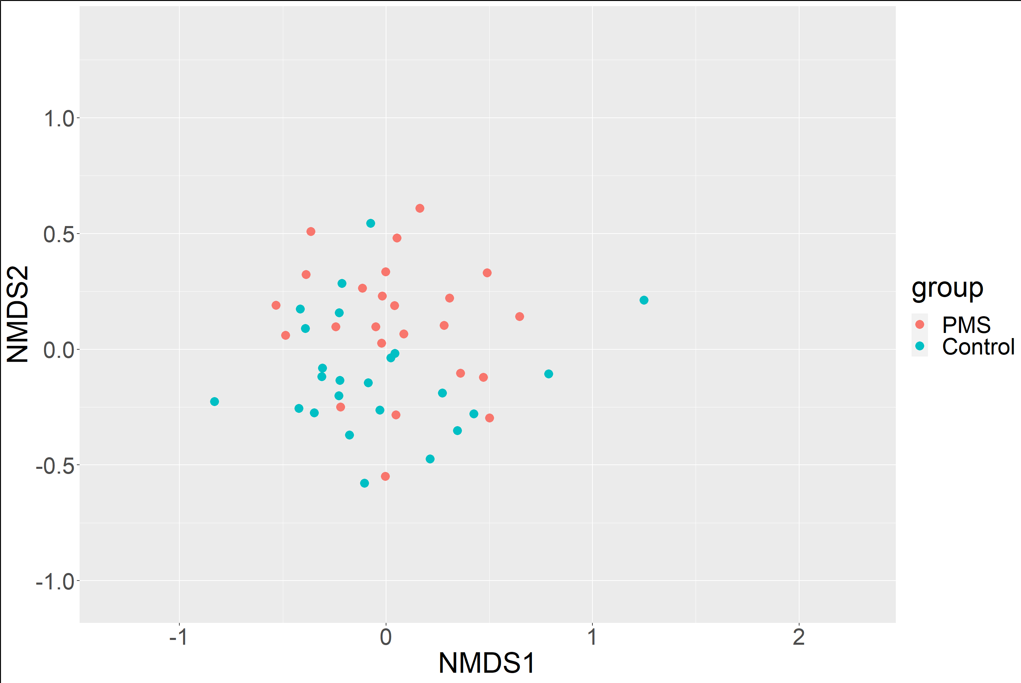


**Supplementary Figure 1.**

Comparison between the β-diversity of the PMS and control groups. Subjects were randomly selected (PMS: n=24, control: n=24). The distance between the two groups was visualized using the NMDS method (stress=0.211). Distances between samples were calculated using the Bray-Curtis index. A significant difference was observed between the groups at p <0.001 (dispersion=0.838).

Supplementary Table 1 Number of samples by age group in the PMS and control groups.

| Age |  | PMS | Control |
| --- | --- | --- | --- |
| 24–29 | Number of samples | 1 | 15 |
|  | Age | 24.00 (0.00) | 26.73 (1.44) |
| 30–39 | Number of samples | 18 | 52 |
|  | Age | 34.22 (2.55) | 34.75 (2.81) |
| 40–49 | Number of samples | 5 | 77 |
|  | Ages | 44.20 (2.71) | 44.01 (2.71) |
| 30–49 | Number of samples | 23 | 129 |
|  | Age | 36.39 (4.86) | 40.28 (5.31) |
| Values are mean (SD). | | | |

| Supplementary Table 2 Comparison of the top 20 genera based on the relative abundance in each group. | | | | | | | |
| --- | --- | --- | --- | --- | --- | --- | --- |
| PMS | |  | Control | |  |  |  |
| Genus | Relative abundance (%) |  | Genus | Relative abundance (%) |  |  |  |
| *Phocaeicola*† | 16.73 |  | *Phocaeicola*† | 16.88 |  |  |  |
| *Unclassified* | 12.81 |  | *Unclassified* | 14.48 |  |  |  |
| *Bifidobacterium* | 10.60 |  | *Bacteroides* | 14.22 |  |  |  |
| *Bacteroides* | 9.38 |  | *Faecalibacterium* | 7.56 |  |  |  |
| *Faecalibacterium* | 6.56 |  | *Bifidobacterium* | 6.78 |  |  |  |
| *Blautia* | 5.13 |  | *Prevotella* | 4.15 |  |  |  |
| *Collinsella* | 3.96 |  | *Blautia* | 4.06 |  |  |  |
| *Fusicatenibacter* | 2.64 |  | *Alistipes* | 3.31 |  |  |  |
| *Parabacteroides* | 2.60 |  | *Parabacteroides* | 3.00 |  |  |  |
| *Megamonas* | 2.59 |  | *Fusicatenibacter* | 2.26 |  |  |  |
| *Prevotella* | 2.52 |  | *Lachnospira* | 2.03 |  |  |  |
| *Streptococcus* | 2.03 |  | *Megamonas* | 1.90 |  |  |  |
| *Alistipes* | 1.81 |  | *Anaerostipes* | 1.67 |  |  |  |
| *Anaerostipes* | 1.34 |  | *Agathobacter* | 1.23 |  |  |  |
| *Fusobacterium* | 1.20 |  | *Anaerobutyricum* | 1.05 |  |  |  |
| *Megasphaera* | 1.12 |  | *Roseburia* | 0.98 |  |  |  |
| *Agathobacter* | 1.04 |  | *Ruminococcus* | 0.95 |  |  |  |
| *Anaerobutyricum* | 0.94 |  | *Collinsella* | 0.88 |  |  |  |
| *Ruminococcus* | 0.90 |  | *Veillonella* | 0.74 |  |  |  |
| *Dorea* | 0.87 |  | *Faecalibacillus* | 0.70 |  |  |  |
| Others | 13.23 |  | Others | 11.16 |  |  |  |
| Values are presented as means. | | |  |  |  |  |  |
| †*Phocaeicola* is a genus reclassified from *Bacteroides* in 2019.35 | | | | |  |  |  |
|  |  |  |  |  |  |  |  |

| Supplementary Table 3 Top 20 genera based on the absolute value of the effect size by age group | | | | | |
| --- | --- | --- | --- | --- | --- |
|  |  |  |  |  |  |
| Supplementary Table 3 A. Comparison of participants aged 30–39 years belonging to the PMS and control groups in their 30s | | | | | |
| Genus | Relative abundance (%) | | p-value |  | Effect size |
| PMS_30s | Control_30s |
| *Collinsella* | 4.11 | 0.94 | 0.004 | *** | 0.78 |
| *Enterocloster* | 0.34 | 0.23 | 0.035 | * | 0.64 |
| *Sellimonas* | 0.31 | 0.06 | 0.056 |  | 0.61 |
| *Erysipelatoclostridium* | 0.36 | 0.18 | 0.077 |  | 0.52 |
| *Dysosmobacter* | 0.35 | 0.20 | 0.112 |  | 0.44 |
| *Blautia* | 5.69 | 4.83 | 0.184 |  | 0.42 |
| *Eggerthella* | 0.12 | 0.06 | 0.224 |  | 0.41 |
| *Bifidobacterium* | 9.96 | 7.30 | 0.146 |  | 0.40 |
| *Oscillibacter* | 0.01 | 0.28 | 0.259 |  | -0.38 |
| *Ruminococcus2* | 0.80 | 0.40 | 0.123 |  | 0.36 |
| *Phocaeicola* | 17.80 | 15.63 | 0.174 |  | 0.34 |
| *Faecalimonas* | 0.23 | 0.03 | 0.400 |  | 0.33 |
| *Holdemania* | 0.03 | 0.00 | 0.350 |  | 0.33 |
| *Enterococcus* | 0.00 | 0.05 | 0.373 |  | -0.31 |
| *Ruthenibacterium* | 0.12 | 0.05 | 0.401 |  | 0.30 |
| *Fusobacterium* | 1.58 | 0.17 | 0.458 |  | 0.30 |
| *Streptococcus* | 2.52 | 0.44 | 0.427 |  | 0.29 |
| *Merdimonas* | 0.12 | 0.02 | 0.490 |  | 0.29 |
| *Flavonifractor* | 0.24 | 0.31 | 0.352 |  | 0.29 |
| *Dialister* | 0.10 | 0.56 | 0.430 |  | -0.28 |
|  |  |  |  |  |  |
| Supplementary Table 3 B. Comparison of participants aged 40–49 years belonging to the PMS and control groups in their 40s | | | | | |
| Genus | Relative abundance (%) | | p-value |  | Effect size |
| PMS_40s | Control_40s |
| *Collinsella* | 3.86 | 0.87 | 0.16 |  | 1.249 |
| *Dorea* | 1.55 | 0.68 | 0.40 |  | 0.737 |
| *Bifidobacterium* | 13.76 | 6.32 | 0.61 |  | 0.714 |
| *Megasphaera* | 2.84 | 0.46 | 0.76 |  | 0.627 |
| *Clostridium_IV* | 0.16 | 0.18 | 0.74 |  | 0.561 |
| *Unclassified* | 24.81 | 14.36 | 0.76 |  | 0.534 |
| *Faecalibacillus* | 1.72 | 0.78 | 0.80 |  | 0.424 |
| *Megamonas* | 0.00 | 2.11 | 0.77 |  | -0.421 |
| *Turicibacter* | 0.00 | 0.12 | 0.81 |  | -0.408 |
| *Blautia* | 3.24 | 3.43 | 0.79 |  | 0.392 |
| *Paraprevotella* | 0.00 | 0.40 | 0.80 |  | -0.365 |
| *Barnesiella* | 0.19 | 0.81 | 0.90 |  | -0.345 |
| *Ruthenibacterium* | 0.00 | 0.13 | 0.87 |  | -0.318 |
| *Ruminococcus2* | 0.10 | 0.32 | 0.88 |  | -0.315 |
| *Clostridium_sensu_stricto* | 0.00 | 0.12 | 0.84 |  | -0.282 |
| *Anaerotignum* | 0.02 | 0.15 | 0.88 |  | -0.265 |
| *Holdemanella* | 0.00 | 0.41 | 0.87 |  | -0.265 |
| *Odoribacter* | 1.41 | 0.53 | 0.91 |  | -0.259 |
| *Neglecta* | 0.94 | 0.42 | 0.90 |  | 0.252 |
| *Prevotella* | 0.03 | 5.38 | 0.91 |  | -0.252 |
| The relative abundance values are presented as means. P-values were calculated using the Wilcoxon rank-sum test with Benjamini-Hochberg FDR correction. *p-value < 0.05 and ***p-value < 0.001. The effect size was calculated using the ALDEx2 pipeline. | | | | | |
|  |
|  |
|  |
|  |
